# Supplementary material
Source: publisher figshare collection journal article supplement (https://acs.figshare.com/ndownloader/files/4481908)
Supplement: Supplementary file 1 [file 4481908]

## Supporting Information

### One-Pot Synthesis of Hollow PbSe Single-Crystalline Nanoboxes via Gas Bubble

#### Assisted Ostwald Ripening

Shutang Chen,<sup>†</sup> Xiaoling Zhang,<sup>\*,†</sup> Xiaomiao Hou,<sup>†</sup> Qi Zhou,<sup>†</sup> Weihong Tan<sup>\*,‡</sup>

<sup>†</sup> Department of Chemistry, Beijing Institute of Technology, Beijing 100081, People's Republic of China

<sup>‡</sup> Center for Research at Bio/nano Interface, Department of Chemistry and Shands Cancer Center, UF Genetics

Institute and McKnight Brain Institute, University of Florida, Gainesville, Florida 32611-7200, USA

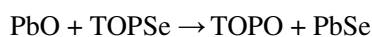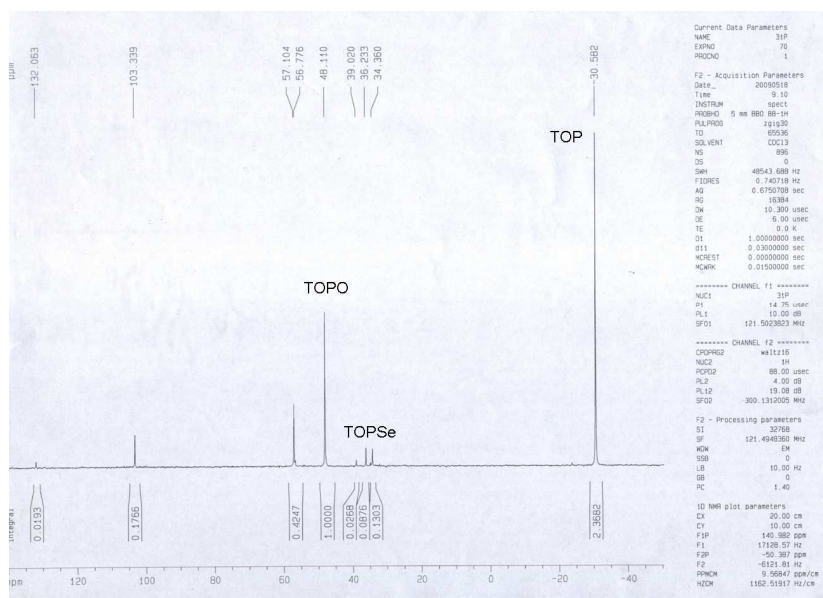

Figure S1. <sup>31</sup>P NMR spectrum of reaction solution obtained at 150 °C for reaction 1 min. The above <sup>31</sup>P NMR spectrum was collected on a 400 MHz Bruker AVANCEII spectrometer. The crude reaction mixture was dissolved in CDCl<sub>3</sub>. The peaks for TOPO, TOPSe and TOP are at 48.1 ppm, 36.2 ppm and -30.6 ppm, respectively.

\*Corresponding authors. Phone: 86-010-88875298, Fax: 86-010-88875298, E-mail: zhangxl@bit.edu.cn (X. Zhang), tan@chem.ufl.edu (W. Tan).
